# Supplementary material for: A metabolomics approach to profiling the cardioprotective effect of LCZ696, an angiotensin receptor-neprilysin inhibitor, on ischemia induced heart failure
Source: Royal Society of Chemistry journal article supplement (doi:10.1039/c7ra01404j), 2017-01-01
Supplement: c7ra01404j1.pdf [file c7ra01404j1.pdf]

## MS/MS data information of potential biomarkers

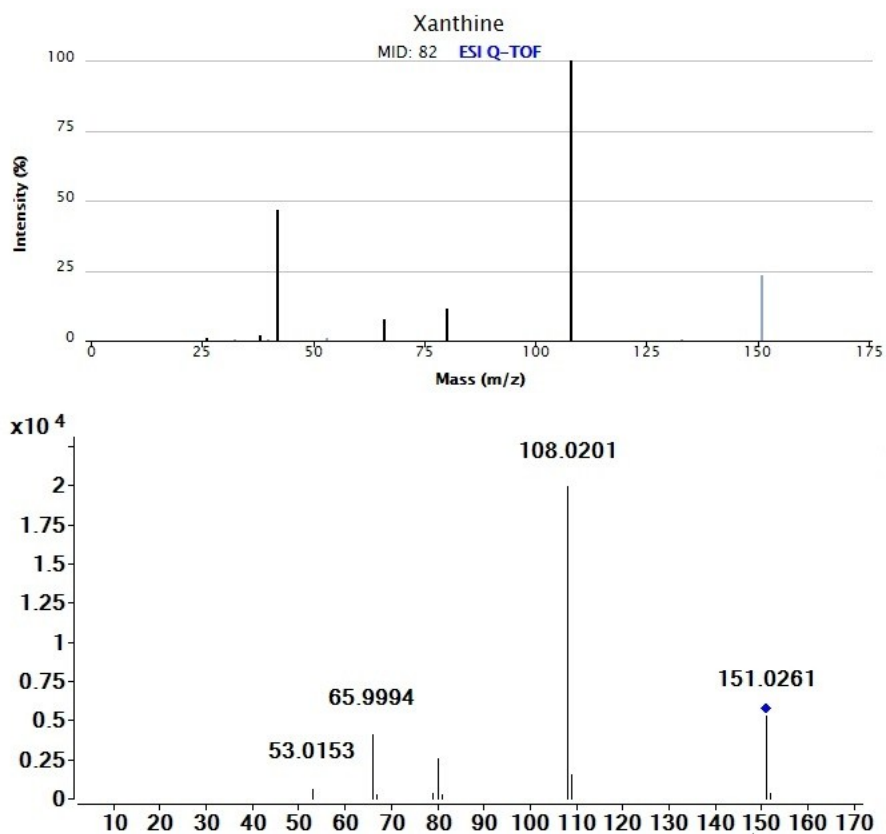

Figure S1. Identification of xanthine by MS/MS.

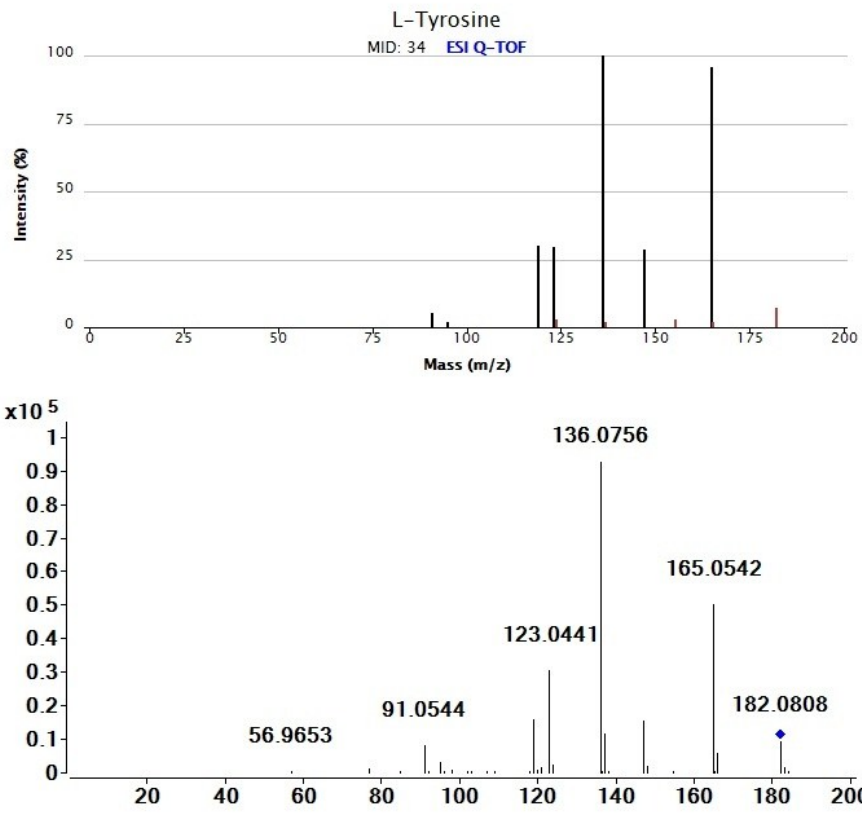

Figure S2. Identification of L-Tyrosine by MS/MS.

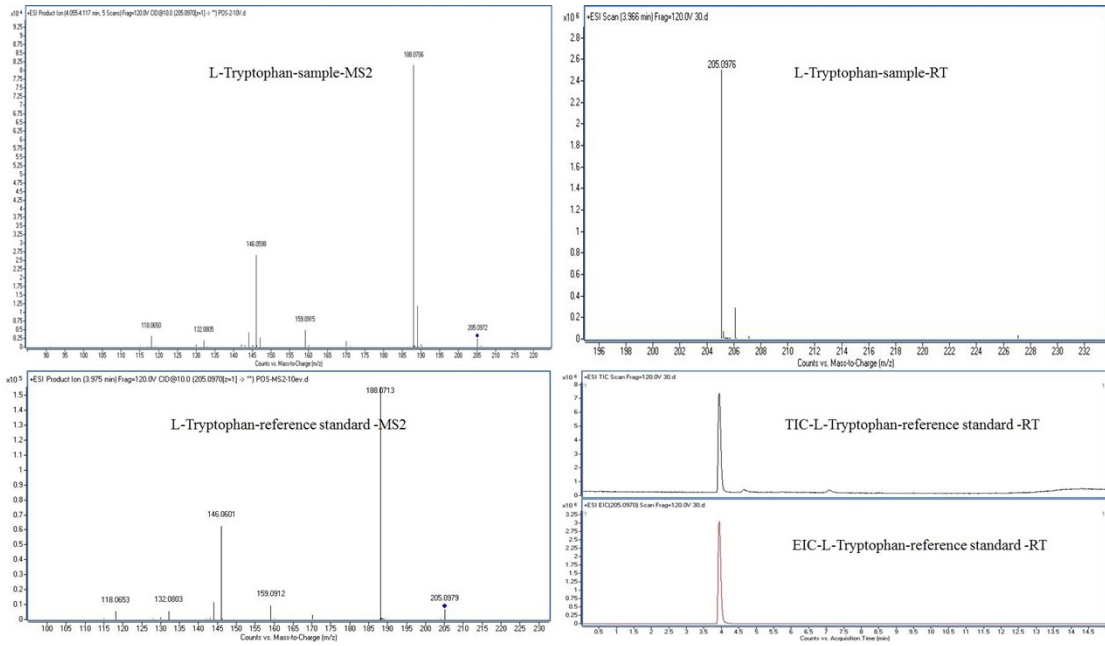

Figure S3. Identification of L-Tryptophan by standard comparison.

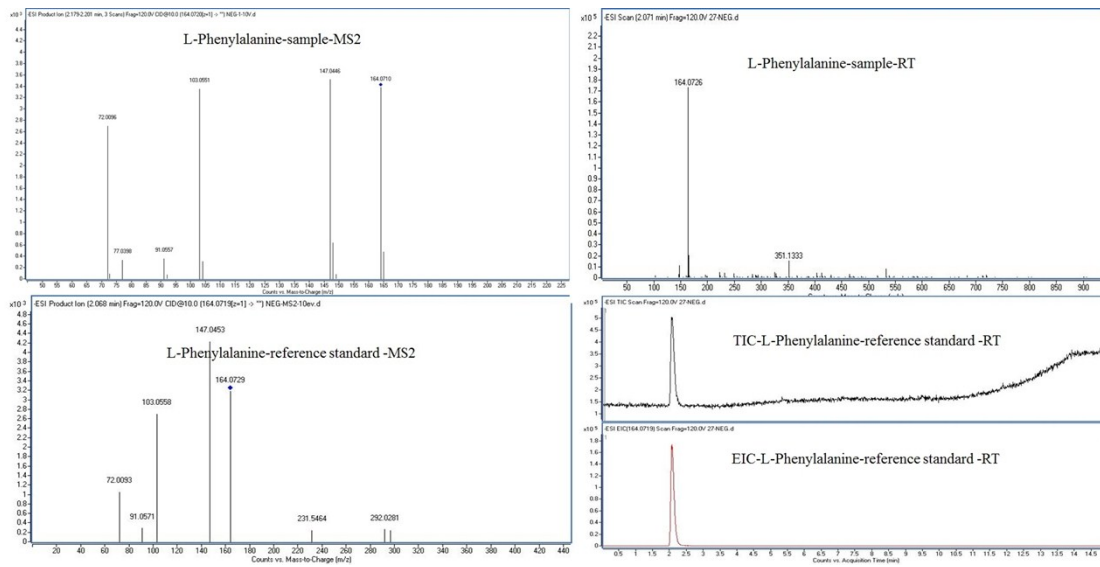

Figure S4. Identification of L-Phenylalanine by standard comparison.

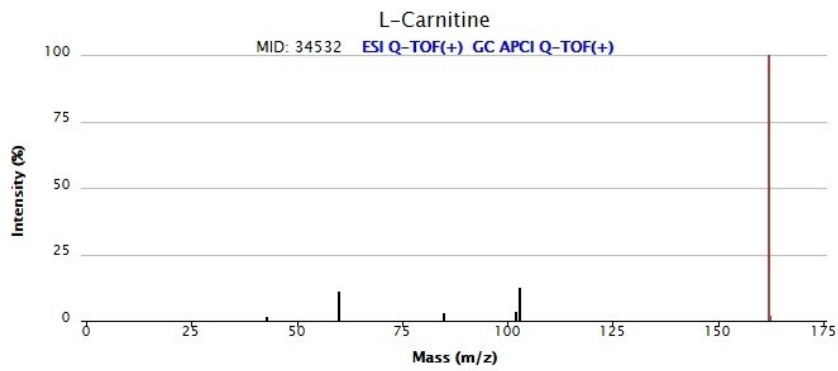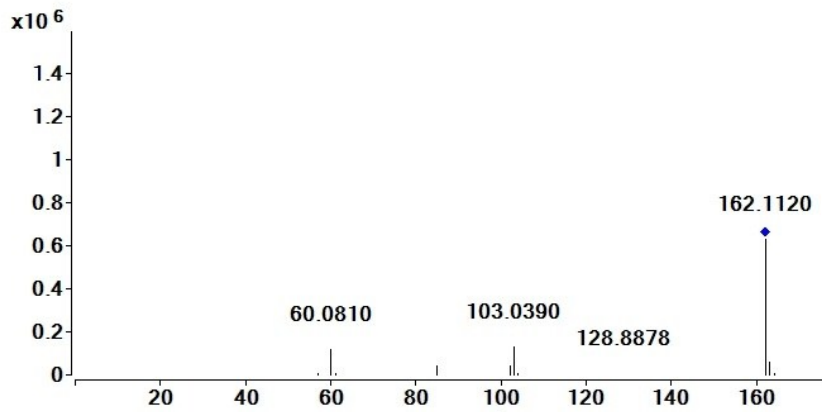

Figure S5. Identification of L-Carnitine by MS/MS.

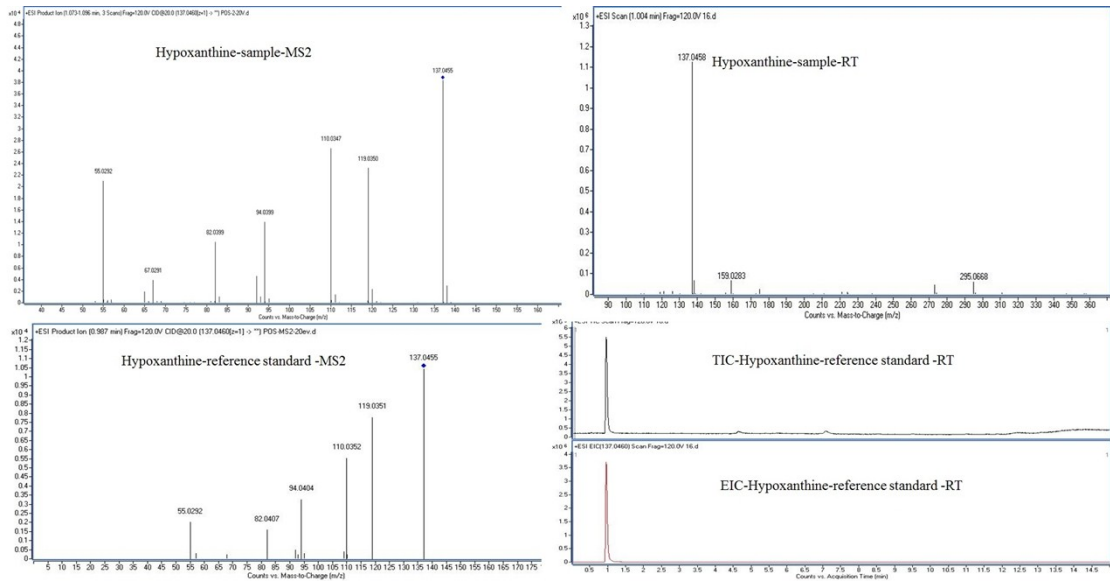

Figure S6. Identification of hypoxanthine by standard comparison.

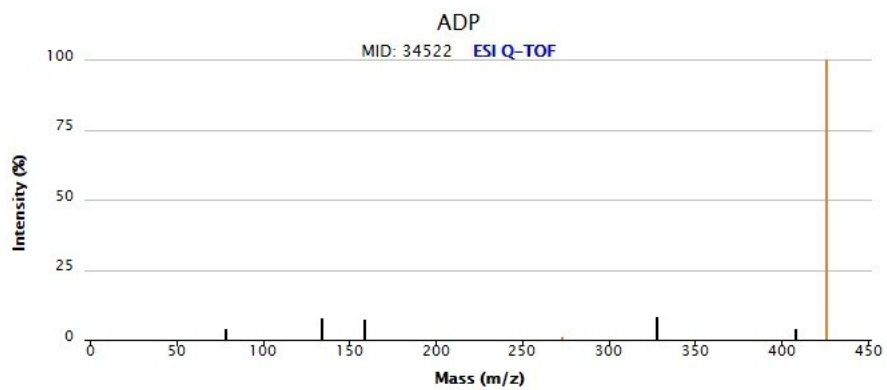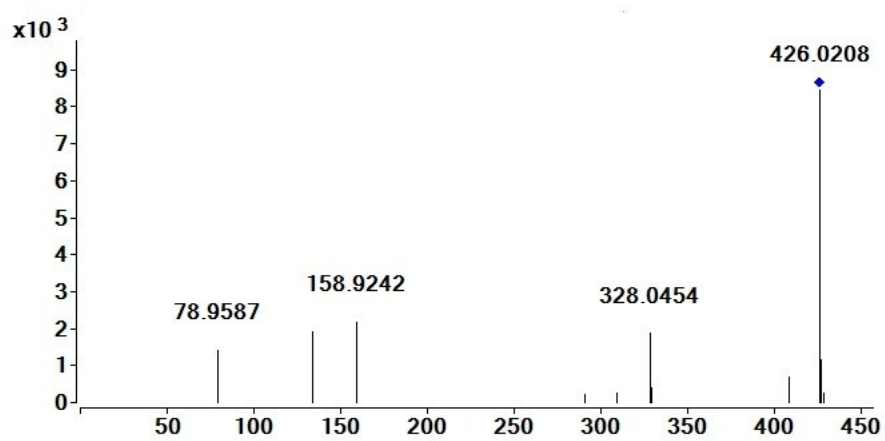

Figure S7. Identification of ADP by MS/MS.
